# Supplementary material for: Inferring Evolutionary Histories of Pathway Regulation from Transcriptional Profiling Data
Source: PLoS Comput Biol. 2013 Oct 10;9(10):e1003255. doi: 10.1371/journal.pcbi.1003255 (PMC3794907; doi:10.1371/journal.pcbi.1003255)
Supplement: Table S3 — Fitted models of -regulatory evolution in yeast pathways. Data are as in Table 1 of the main text except that results for all pathways are shown. (XLSX) [file pcbi.1003255.s011.xlsx]

## Sheet: Sheet1
GO term	N	Model	wAIC	Constraint or shift parameter
GO:0031938_P	11	Equal Rates	0.308426	1
GO:0006520_P	19	Equal Rates	0.305524	1
GO:0045893_P	15	Equal Rates	0.304235	1
GO:0006360_P	11	Equal Rates	0.302309	1
GO:0045943_P	12	Equal Rates	0.300634	1
GO:0008299_P	11	Equal Rates	0.299322	1
GO:0055072_P	18	Equal Rates	0.297945	1
GO:0006895_P	14	Equal Rates	0.296191	1
GO:0006301_P	12	Equal Rates	0.290395	1
GO:0007096_P	16	Equal Rates	0.290389	1
GO:0006298_P	23	Equal Rates	0.289263	1
GO:0016575_P	19	Equal Rates	0.288751	1
GO:0009117_P	12	Equal Rates	0.288741	1
GO:0006665_P	15	Equal Rates	0.287331	1
GO:0009082_P	11	Equal Rates	0.287288	1
GO:0035556_P	15	Equal Rates	0.284571	1
GO:0051726_P	29	Equal Rates	0.284329	1
GO:0030001_P	11	Equal Rates	0.283766	1
GO:0006612_P	13	Equal Rates	0.282614	1
GO:0006261_P	18	Equal Rates	0.2818	1
GO:0006337_P	17	Equal Rates	0.281086	1
GO:0006913_P	16	Equal Rates	0.277973	1
GO:0009651_P	11	Equal Rates	0.277694	1
GO:0009073_P	12	Equal Rates	0.27599	1
GO:0030148_P	16	Equal Rates	0.274995	1
GO:0006873_P	11	Equal Rates	0.274801	1
GO:0006342_P	11	Equal Rates	0.274682	1
GO:0009408_P	16	Equal Rates	0.273794	1
GO:0006312_P	11	Equal Rates	0.271533	1
GO:0034401_P	17	Equal Rates	0.271435	1
GO:0003333_P	21	Equal Rates	0.269239	1
GO:0000045_P	12	Equal Rates	0.268608	1
GO:0006369_P	12	Equal Rates	0.26834	1
GO:0016973_P	21	Equal Rates	0.266762	1
GO:0006493_P	13	Equal Rates	0.266396	1
GO:0006259_P	12	Equal Rates	0.264779	1
GO:0000028_P	12	Equal Rates	0.261415	1
GO:0007131_P	46	Equal Rates	0.261234	1
GO:0042138_P	11	Equal Rates	0.260875	1
GO:0006607_P	11	Equal Rates	0.260355	1
GO:0006487_P	29	Equal Rates	0.259957	1
GO:0008361_P	24	Equal Rates	0.259317	1
GO:0007103_P	14	Equal Rates	0.258493	1
GO:0007035_P	23	Equal Rates	0.25831	1
GO:0006378_P	18	Equal Rates	0.257744	1
GO:0006730_P	14	Equal Rates	0.256103	1
GO:0000725_P	12	Equal Rates	0.255942	1
GO:0006400_P	15	Equal Rates	0.253744	1
GO:0006367_P	14	Equal Rates	0.249615	1
GO:0000086_P	26	Equal Rates	0.247908	1
GO:0006407_P	18	Equal Rates	0.247618	1
GO:0005978_P	13	Equal Rates	0.247487	1
GO:0051603_P	17	Equal Rates	0.247131	1
GO:0006811_P	88	Equal Rates	0.246923	1
GO:0006272_P	12	Equal Rates	0.24692	1
GO:0032313_P	11	Equal Rates	0.246431	1
GO:0006950_P	103	Equal Rates	0.243757	1
GO:0031124_P	23	Equal Rates	0.240548	1
GO:0022900_P	39	Equal Rates	0.238527	1
GO:0033617_P	18	Equal Rates	0.237996	1
GO:0000710_P	11	Equal Rates	0.236987	1
GO:0006096_P	22	Equal Rates	0.236288	1
GO:0043486_P	14	Equal Rates	0.233746	1
GO:0006865_P	33	Equal Rates	0.231263	1
GO:0006379_P	26	Equal Rates	0.231063	1
GO:0007094_P	23	Equal Rates	0.228993	1
GO:0030174_P	11	Equal Rates	0.227429	1
GO:0015914_P	14	Equal Rates	0.225162	1
GO:0042026_P	13	Equal Rates	0.222268	1
GO:0042273_P	37	Equal Rates	0.222258	1
GO:0006807_P	11	Equal Rates	0.216885	1
GO:0015991_P	13	Equal Rates	0.216665	1
GO:0006289_P	31	Equal Rates	0.21657	1
GO:0007076_P	11	Equal Rates	0.214983	1
GO:0006006_P	22	Equal Rates	0.214587	1
GO:0006461_P	27	Equal Rates	0.211982	1
GO:0006970_P	25	Equal Rates	0.211414	1
GO:0016485_P	14	Equal Rates	0.210045	1
GO:0048309_P	11	Equal Rates	0.205736	1
GO:0051666_P	13	S. paradoxus and S. cerevisiae shift	0.723315	0.448162
GO:0006896_P	22	S. paradoxus and S. cerevisiae shift	0.571772	0.599072
GO:0006888_P	76	S. paradoxus and S. cerevisiae shift	0.475151	0.558568
GO:0030473_P	12	S. paradoxus and S. cerevisiae shift	0.451199	1.68549
GO:0043162_P	14	S. paradoxus and S. cerevisiae shift	0.368242	0.480327
GO:0000466_P	15	S. paradoxus and S. cerevisiae shift	0.345021	0.179735
GO:0006508_P	104	S. paradoxus and S. cerevisiae shift	0.306106	0.61892
GO:0032880_P	12	S. paradoxus and S. cerevisiae shift	0.3035	0.16229
GO:0006878_P	12	S. paradoxus and S. cerevisiae shift	0.291519	1.5254
GO:0043161_P	34	S. paradoxus and S. cerevisiae shift	0.291406	0.410739
GO:0030242_P	21	S. paradoxus and S. cerevisiae shift	0.282136	1.24315
GO:0007117_P	14	S. paradoxus and S. cerevisiae shift	0.245563	0.246632
GO:0008360_P	11	S. paradoxus and S. cerevisiae shift	0.236944	0.758004
GO:0045324_P	16	S. paradoxus and S. cerevisiae shift	0.220815	0.67998
GO:0015986_P	13	S. paradoxus and S. cerevisiae shift	0.219517	1.24342
GO:0043547_P	33	S. paradoxus and S. cerevisiae shift	0.199314	0.562917
GO:0031146_P	17	S. paradoxus and S. cerevisiae shift	0.198505	0.60651
GO:0006334_P	11	S. paradoxus and S. cerevisiae shift	0.17506	0.376325
GO:0006338_P	45	S. cerevisiae shift	0.84034	2.04399
GO:0000463_P	20	S. cerevisiae shift	0.789157	0.0313869
GO:0006325_P	11	S. cerevisiae shift	0.613179	3.8388
GO:0030150_P	19	S. cerevisiae shift	0.504624	1.50926
GO:0000077_P	18	S. cerevisiae shift	0.485737	2.74066
GO:0006409_P	11	S. cerevisiae shift	0.47991	0.519839
GO:0007064_P	22	S. cerevisiae shift	0.479766	2.13114
GO:0006486_P	53	S. cerevisiae shift	0.466989	0.859966
GO:0006450_P	14	S. cerevisiae shift	0.411947	2.75063
GO:0006418_P	30	S. cerevisiae shift	0.392773	1.27243
GO:0007059_P	66	S. cerevisiae shift	0.387487	1.75874
GO:0008298_P	14	S. cerevisiae shift	0.380831	1.54424
GO:0006470_P	35	S. cerevisiae shift	0.346133	1.7814
GO:0006537_P	11	S. cerevisiae shift	0.333635	2.02112
GO:0015992_P	36	S. cerevisiae shift	0.325131	1.23818
GO:0000480_P	29	S. cerevisiae shift	0.309351	1.95597
GO:0000472_P	31	S. cerevisiae shift	0.305668	2.05338
GO:0000447_P	39	S. cerevisiae shift	0.295433	1.84766
GO:0016226_P	21	S. cerevisiae shift	0.278946	1.62865
GO:0016558_P	13	S. cerevisiae shift	0.277931	1.43374
GO:0016925_P	11	S. cerevisiae shift	0.26787	0.607289
GO:0006754_P	18	S. cerevisiae shift	0.259824	1.2621
GO:0000973_P	16	S. cerevisiae shift	0.255979	0.826694
GO:0006812_P	28	S. cerevisiae shift	0.239893	1.29089
GO:0006273_P	11	S. cerevisiae shift	0.234949	1.58862
GO:0070131_P	11	S. cerevisiae shift	0.217224	2.94281
GO:0016070_P	12	S. cerevisiae shift	0.213129	0.972425
GO:0005977_P	15	S. cerevisiae shift	0.191103	2.37374
GO:0006897_P	73	S. paradoxus shift	0.965743	0.641167
GO:0044255_P	13	S. paradoxus shift	0.945799	0.259536
GO:0030437_P	45	S. paradoxus shift	0.931136	0.549662
GO:0000054_P	11	S. paradoxus shift	0.915233	0.113565
GO:0001302_P	38	S. paradoxus shift	0.859867	0.624028
GO:0006906_P	18	S. paradoxus shift	0.797201	0.1515
GO:0030476_P	39	S. paradoxus shift	0.796139	0.868564
GO:0071038_P	15	S. paradoxus shift	0.793931	1.03404
GO:0006506_P	29	S. paradoxus shift	0.78612	0.426433
GO:0030435_P	94	S. paradoxus shift	0.719577	0.93162
GO:0006412_P	228	S. paradoxus shift	0.605871	1.29743
GO:0071035_P	15	S. paradoxus shift	0.593884	2.01192
GO:0016192_P	130	S. paradoxus shift	0.568272	0.794348
GO:0009272_P	13	S. paradoxus shift	0.550978	1.00549
GO:0006915_P	20	S. paradoxus shift	0.544138	0.291718
GO:0006457_P	93	S. paradoxus shift	0.537648	0.732695
GO:0007121_P	16	S. paradoxus shift	0.530288	2.06399
GO:0071042_P	13	S. paradoxus shift	0.524975	1.77017
GO:0030163_P	15	S. paradoxus shift	0.521693	0.0001
GO:0070481_P	19	S. paradoxus shift	0.517192	0.980293
GO:0006302_P	25	S. paradoxus shift	0.492617	0.705837
GO:0001403_P	37	S. paradoxus shift	0.481923	0.829308
GO:0006468_P	120	S. paradoxus shift	0.481523	1.2625
GO:0006267_P	15	S. paradoxus shift	0.480564	0.572318
GO:0032889_P	12	S. paradoxus shift	0.476727	0.284165
GO:0032511_P	13	S. paradoxus shift	0.459621	0.42298
GO:0071051_P	14	S. paradoxus shift	0.453188	1.97295
GO:0006260_P	72	S. paradoxus shift	0.449517	1.55655
GO:0007118_P	17	S. paradoxus shift	0.444387	0.262676
GO:0006139_P	21	S. paradoxus shift	0.433665	0.677831
GO:0002098_P	22	S. paradoxus shift	0.427618	0.244502
GO:0007120_P	14	S. paradoxus shift	0.390535	0.750917
GO:0032259_P	65	S. paradoxus shift	0.388188	1.13779
GO:0034087_P	15	S. paradoxus shift	0.378301	1.34432
GO:0000754_P	12	S. paradoxus shift	0.375179	0.73505
GO:0000082_P	27	S. paradoxus shift	0.364835	0.487827
GO:0009116_P	12	S. paradoxus shift	0.352411	0.775115
GO:0042797_P	15	S. paradoxus shift	0.35201	0.360721
GO:0042274_P	25	S. paradoxus shift	0.349493	0.513923
GO:0035335_P	12	S. paradoxus shift	0.333013	4.27337
GO:0000742_P	13	S. paradoxus shift	0.331755	0.695208
GO:0000184_P	17	S. paradoxus shift	0.310262	2.39534
GO:0006869_P	17	S. paradoxus shift	0.298398	0.355052
GO:0006270_P	32	S. paradoxus shift	0.289414	1.10483
GO:0042787_P	22	S. paradoxus shift	0.288816	0.578832
GO:0051123_P	28	S. paradoxus shift	0.286637	1.49448
GO:0000027_P	29	S. paradoxus shift	0.285499	0.484955
GO:0006094_P	15	S. paradoxus shift	0.275707	0.828446
GO:0006464_P	19	S. paradoxus shift	0.256682	0.962685
GO:0006611_P	14	S. paradoxus shift	0.252125	0.544948
GO:0006914_P	49	S. paradoxus shift	0.249087	1.07343
GO:0007004_P	11	S. paradoxus shift	0.242965	2.30917
GO:0000183_P	22	S. paradoxus shift	0.241629	0.783832
GO:0000722_P	11	S. paradoxus shift	0.236671	1.77713
GO:0008652_P	88	S. paradoxus shift	0.222004	1.20096
GO:0042790_P	15	S. paradoxus shift	0.217089	0.480451
GO:0090305_P	36	S. paradoxus shift	0.211372	1.31557
GO:0042493_P	18	S. paradoxus shift	0.20239	0.6428
GO:0045047_P	14	S. mikatae shift	0.780822	4.71677
GO:0031505_P	72	S. mikatae shift	0.756602	2.2824
GO:0006184_P	31	S. mikatae shift	0.703725	3.87455
GO:0031145_P	11	S. mikatae shift	0.622248	7.29864
GO:0007020_P	19	S. mikatae shift	0.61421	3.67851
GO:0007067_P	122	S. mikatae shift	0.566511	1.99463
GO:0009086_P	26	S. mikatae shift	0.540714	3.79071
GO:0006891_P	21	S. mikatae shift	0.515574	0.0001
GO:0031939_P	14	S. mikatae shift	0.460902	5.45403
GO:0000467_P	16	S. mikatae shift	0.409282	4.2803
GO:0044267_P	12	S. mikatae shift	0.366079	0.0001
GO:0046854_P	12	S. mikatae shift	0.361137	3.3491
GO:0001558_P	11	S. mikatae shift	0.341804	4.29796
GO:0000413_P	14	S. mikatae shift	0.331687	0.0452239
GO:0016311_P	21	S. mikatae shift	0.29665	2.67605
GO:0070651_P	15	S. mikatae shift	0.292166	3.32831
GO:0016579_P	16	S. mikatae shift	0.2917	0.0877172
GO:0051276_P	15	S. mikatae shift	0.284275	2.66866
GO:0006396_P	25	S. mikatae shift	0.274391	2.44383
GO:0009058_P	35	S. mikatae shift	0.271648	2.03538
GO:0006164_P	14	S. mikatae shift	0.25623	0.17014
GO:0030472_P	20	S. mikatae shift	0.24883	2.35611
GO:0044262_P	14	S. mikatae shift	0.247063	3.07498
GO:0019344_P	12	S. mikatae shift	0.242851	4.1075
GO:0006284_P	15	S. mikatae shift	0.176722	2.46262
GO:0006629_P	136	S. bayanus shift	0.916503	1.96432
GO:0016310_P	188	S. bayanus shift	0.902247	1.74173
GO:0006351_P	462	S. bayanus shift	0.849913	1.47981
GO:0008152_P	243	S. bayanus shift	0.844717	1.36732
GO:0006355_P	443	S. bayanus shift	0.837382	1.43017
GO:0000122_P	71	S. bayanus shift	0.819216	1.84598
GO:0006631_P	34	S. bayanus shift	0.7345	1.88801
GO:0016568_P	111	S. bayanus shift	0.729786	1.64855
GO:0016567_P	71	S. bayanus shift	0.719318	1.83903
GO:0006397_P	151	S. bayanus shift	0.707159	1.39641
GO:0055085_P	164	S. bayanus shift	0.652957	1.3635
GO:0000398_P	70	S. bayanus shift	0.642882	1.39604
GO:0006417_P	45	S. bayanus shift	0.639986	2.16562
GO:0006633_P	21	S. bayanus shift	0.638105	2.57184
GO:0006357_P	94	S. bayanus shift	0.61664	1.71968
GO:0007165_P	63	S. bayanus shift	0.606771	2.48949
GO:0045454_P	27	S. bayanus shift	0.597643	2.4223
GO:0006281_P	175	S. bayanus shift	0.592037	1.68963
GO:0016236_P	24	S. bayanus shift	0.567879	2.12214
GO:0000723_P	33	S. bayanus shift	0.563982	1.90789
GO:0016573_P	41	S. bayanus shift	0.549387	1.9421
GO:0006368_P	48	S. bayanus shift	0.533264	1.51808
GO:0051301_P	177	S. bayanus shift	0.525445	1.50092
GO:0007049_P	291	S. bayanus shift	0.512555	1.43379
GO:0016042_P	24	S. bayanus shift	0.508093	1.94722
GO:0008654_P	35	S. bayanus shift	0.494691	2.75502
GO:0034727_P	33	S. bayanus shift	0.483291	2.19311
GO:0005975_P	80	S. bayanus shift	0.472291	1.28371
GO:0008380_P	93	S. bayanus shift	0.469327	1.11765
GO:0000147_P	13	S. bayanus shift	0.465071	3.47763
GO:0006303_P	22	S. bayanus shift	0.448466	3.19976
GO:0006415_P	12	S. bayanus shift	0.441262	2.27582
GO:0045944_P	127	S. bayanus shift	0.44073	1.69142
GO:0030036_P	28	S. bayanus shift	0.423959	2.70041
GO:0030950_P	12	S. bayanus shift	0.412423	5.67221
GO:0007015_P	32	S. bayanus shift	0.411966	1.51356
GO:0006887_P	38	S. bayanus shift	0.400675	1.69108
GO:0000070_P	24	S. bayanus shift	0.389888	2.08244
GO:0030968_P	12	S. bayanus shift	0.384527	2.79305
GO:0008643_P	12	S. bayanus shift	0.363726	3.24642
GO:0000079_P	25	S. bayanus shift	0.362583	2.21707
GO:0000724_P	16	S. bayanus shift	0.359885	2.01096
GO:0007033_P	13	S. bayanus shift	0.358583	1.57287
GO:0034475_P	11	S. bayanus shift	0.353085	3.12031
GO:0034221_P	11	S. bayanus shift	0.347003	1.94896
GO:0000282_P	22	S. bayanus shift	0.344549	1.78343
GO:0070478_P	16	S. bayanus shift	0.339596	2.18058
GO:0070816_P	14	S. bayanus shift	0.336785	1.40999
GO:0007034_P	17	S. bayanus shift	0.334914	1.79732
GO:0000011_P	17	S. bayanus shift	0.333646	2.43129
GO:0032258_P	36	S. bayanus shift	0.333366	1.29058
GO:0009060_P	47	S. bayanus shift	0.325534	1.09742
GO:0031929_P	17	S. bayanus shift	0.315667	2.42625
GO:0034427_P	12	S. bayanus shift	0.308674	3.13632
GO:0006744_P	11	S. bayanus shift	0.308615	1.89517
GO:0000921_P	13	S. bayanus shift	0.297805	2.14245
GO:0032968_P	22	S. bayanus shift	0.292796	2.48367
GO:0006098_P	13	S. bayanus shift	0.280161	3.18905
GO:0006413_P	39	S. bayanus shift	0.271671	1.46445
GO:0006890_P	27	S. bayanus shift	0.269972	1.95025
GO:0006446_P	13	S. bayanus shift	0.26567	1.94558
GO:0030433_P	44	S. bayanus shift	0.238279	1.11005
GO:0007154_P	15	S. bayanus shift	0.22248	1.38006
GO:0006333_P	16	S. bayanus shift	0.219321	1.18498
GO:0030466_P	39	S. bayanus shift	0.213032	1.62938
GO:0010499_P	13	S. bayanus shift	0.206685	1.35747
GO:0042147_P	19	S. bayanus shift	0.19507	2.36081
GO:0042254_P	163	Ornstein-Uhlenbeck	0.924785	1.09902
GO:0006364_P	177	Ornstein-Uhlenbeck	0.902359	1.03422
GO:0034599_P	57	Ornstein-Uhlenbeck	0.899406	0.797141
GO:0032543_P	84	Ornstein-Uhlenbeck	0.727415	1.11332
GO:0007124_P	48	Ornstein-Uhlenbeck	0.650455	0.815773
GO:0006310_P	44	Ornstein-Uhlenbeck	0.648682	1.0406
GO:0008033_P	69	Ornstein-Uhlenbeck	0.64832	1.19063
GO:0000055_P	22	Ornstein-Uhlenbeck	0.642087	1.35211
GO:0006974_P	188	Ornstein-Uhlenbeck	0.614369	1.41666
GO:0008150_P	723	Ornstein-Uhlenbeck	0.590407	1.24882
GO:0030488_P	18	Ornstein-Uhlenbeck	0.586259	0.867033
GO:0006099_P	28	Ornstein-Uhlenbeck	0.572687	0.976076
GO:0006511_P	62	Ornstein-Uhlenbeck	0.560813	1.52551
GO:0000727_P	25	Ornstein-Uhlenbeck	0.549855	0.8843
GO:0042144_P	28	Ornstein-Uhlenbeck	0.528901	1.40223
GO:0006886_P	80	Ornstein-Uhlenbeck	0.527525	1.29225
GO:0006406_P	33	Ornstein-Uhlenbeck	0.526251	1.28901
GO:0006366_P	89	Ornstein-Uhlenbeck	0.522205	1.31795
GO:0008202_P	22	Ornstein-Uhlenbeck	0.500012	1.21854
GO:0000001_P	26	Ornstein-Uhlenbeck	0.488066	1.76318
GO:0006513_P	15	Ornstein-Uhlenbeck	0.433693	0.701736
GO:0030010_P	29	Ornstein-Uhlenbeck	0.431338	0.810142
GO:0006606_P	36	Ornstein-Uhlenbeck	0.430613	2.00175
GO:0000956_P	12	Ornstein-Uhlenbeck	0.423702	0.690962
GO:0000032_P	12	Ornstein-Uhlenbeck	0.401136	0.392269
GO:0006893_P	23	Ornstein-Uhlenbeck	0.396377	2.03828
GO:0000084_P	12	Ornstein-Uhlenbeck	0.396339	0.916899
GO:0000002_P	33	Ornstein-Uhlenbeck	0.388797	1.32182
GO:0000422_P	27	Ornstein-Uhlenbeck	0.384147	1.47761
GO:0006694_P	23	Ornstein-Uhlenbeck	0.374271	0.96118
GO:0000910_P	26	Ornstein-Uhlenbeck	0.367001	1.13147
GO:0002181_P	128	Ornstein-Uhlenbeck	0.361035	1.1109
GO:0006348_P	52	Ornstein-Uhlenbeck	0.356573	1.15042
GO:0007005_P	32	Ornstein-Uhlenbeck	0.35002	1.17353
GO:0001300_P	17	Ornstein-Uhlenbeck	0.340098	1.66904
GO:0051028_P	61	Ornstein-Uhlenbeck	0.328392	0.981559
GO:0055114_P	225	Ornstein-Uhlenbeck	0.327614	1.44464
GO:0006200_P	34	Ornstein-Uhlenbeck	0.326949	0.94931
GO:0006696_P	22	Ornstein-Uhlenbeck	0.322514	0.80954
GO:0000462_P	55	Ornstein-Uhlenbeck	0.320061	1.16637
GO:0043044_P	20	Ornstein-Uhlenbeck	0.318424	1.55687
GO:0006810_P	681	Ornstein-Uhlenbeck	0.318191	1.01066
GO:0015031_P	362	Ornstein-Uhlenbeck	0.312696	0.977373
GO:0007126_P	124	Ornstein-Uhlenbeck	0.300636	1.18204
GO:0006623_P	42	Ornstein-Uhlenbeck	0.293812	0.900069
GO:0000750_P	23	Ornstein-Uhlenbeck	0.290524	0.595672
GO:0016126_P	26	Ornstein-Uhlenbeck	0.260922	0.480783
GO:0044237_P	12	Ornstein-Uhlenbeck	0.25564	1.03124
GO:0000209_P	19	Ornstein-Uhlenbeck	0.251424	1.41662
GO:0006414_P	23	Ornstein-Uhlenbeck	0.251288	0.965292
GO:0007264_P	48	Ornstein-Uhlenbeck	0.246723	1.36452
GO:0019236_P	29	Ornstein-Uhlenbeck	0.243714	0.881696
GO:0006879_P	28	Ornstein-Uhlenbeck	0.236016	0.866293
GO:0007266_P	14	Ornstein-Uhlenbeck	0.23601	1.61778
GO:0043248_P	15	Ornstein-Uhlenbeck	0.233442	0.466549
GO:0006541_P	16	Ornstein-Uhlenbeck	0.227621	0.7031
GO:0007031_P	25	Ornstein-Uhlenbeck	0.216898	1.17947
GO:0006999_P	11	Ornstein-Uhlenbeck	0.211971	1.32127
