# Supplementary material for: Inferring Evolutionary Histories of Pathway Regulation from Transcriptional Profiling Data
Source: PLoS Comput Biol. 2013 Oct 10;9(10):e1003255. doi: 10.1371/journal.pcbi.1003255 (PMC3794907; doi:10.1371/journal.pcbi.1003255)
Supplement: Table S4 — Fitted models of species regulatory evolution in yeast pathways. Data are as in Table 2 of the main text except that results for all pathways are shown. (XLSX) [file pcbi.1003255.s012.xlsx]

## Sheet: Sheet1
GO term	N	Model	wAIC	Constraint or shift parameter
GO:0009082_P	11	Equal Rates	0.305102	1
GO:0031938_P	11	Equal Rates	0.304882	1
GO:0007035_P	23	Equal Rates	0.303036	1
GO:0035556_P	15	Equal Rates	0.302237	1
GO:0006464_P	19	Equal Rates	0.301299	1
GO:0009408_P	16	Equal Rates	0.297312	1
GO:0019344_P	12	Equal Rates	0.296276	1
GO:0034401_P	17	Equal Rates	0.2946	1
GO:0007154_P	15	Equal Rates	0.293927	1
GO:0010499_P	13	Equal Rates	0.291445	1
GO:0006493_P	13	Equal Rates	0.289753	1
GO:0006289_P	31	Equal Rates	0.289175	1
GO:0008654_P	35	Equal Rates	0.287437	1
GO:0030010_P	29	Equal Rates	0.281744	1
GO:0042026_P	13	Equal Rates	0.280216	1
GO:0016575_P	19	Equal Rates	0.279496	1
GO:0033617_P	18	Equal Rates	0.276691	1
GO:0009073_P	12	Equal Rates	0.275485	1
GO:0008643_P	12	Equal Rates	0.271992	1
GO:0006418_P	30	Equal Rates	0.270945	1
GO:0005977_P	15	Equal Rates	0.269603	1
GO:0051603_P	17	Equal Rates	0.26468	1
GO:0000742_P	13	Equal Rates	0.262447	1
GO:0000413_P	14	Equal Rates	0.260828	1
GO:0009117_P	12	Equal Rates	0.260629	1
GO:0007094_P	23	Equal Rates	0.258984	1
GO:0006450_P	14	Equal Rates	0.258342	1
GO:0007004_P	11	Equal Rates	0.25612	1
GO:0032313_P	11	Equal Rates	0.252262	1
GO:0008360_P	11	Equal Rates	0.251833	1
GO:0030036_P	28	Equal Rates	0.242955	1
GO:0006367_P	14	Equal Rates	0.241399	1
GO:0007005_P	32	Equal Rates	0.236513	1
GO:0030472_P	20	Equal Rates	0.229104	1
GO:0016311_P	21	Equal Rates	0.227737	1
GO:0016579_P	16	Equal Rates	0.227228	1
GO:0007120_P	14	Equal Rates	0.225896	1
GO:0051726_P	29	Equal Rates	0.224916	1
GO:0000084_P	12	Equal Rates	0.224509	1
GO:0034221_P	11	Equal Rates	0.221616	1
GO:0016236_P	24	Equal Rates	0.219406	1
GO:0043486_P	14	Equal Rates	0.218825	1
GO:0000921_P	13	Equal Rates	0.214414	1
GO:0045324_P	16	Equal Rates	0.214408	1
GO:0070131_P	11	Equal Rates	0.205327	1
GO:0000463_P	20	S. paradoxus and S. cerevisiae shift	0.958484	8.28246
GO:0006414_P	23	S. paradoxus and S. cerevisiae shift	0.906688	4.42366
GO:0022900_P	39	S. paradoxus and S. cerevisiae shift	0.794748	3.95265
GO:0000027_P	29	S. paradoxus and S. cerevisiae shift	0.694439	8.45893
GO:0043248_P	15	S. paradoxus and S. cerevisiae shift	0.686287	2.03073
GO:0007096_P	16	S. paradoxus and S. cerevisiae shift	0.605087	0.0001
GO:0000466_P	15	S. paradoxus and S. cerevisiae shift	0.590207	13.3679
GO:0045943_P	12	S. paradoxus and S. cerevisiae shift	0.580629	8.36514
GO:0016973_P	21	S. paradoxus and S. cerevisiae shift	0.557962	3.10726
GO:0006409_P	11	S. paradoxus and S. cerevisiae shift	0.513266	9.3208
GO:0034599_P	57	S. paradoxus and S. cerevisiae shift	0.493274	2.30893
GO:0048309_P	11	S. paradoxus and S. cerevisiae shift	0.488628	0.0001
GO:0006633_P	21	S. paradoxus and S. cerevisiae shift	0.476649	3.72222
GO:0006508_P	104	S. paradoxus and S. cerevisiae shift	0.455354	2.40161
GO:0000723_P	33	S. paradoxus and S. cerevisiae shift	0.444739	2.99536
GO:0006461_P	27	S. paradoxus and S. cerevisiae shift	0.435368	2.23885
GO:0030148_P	16	S. paradoxus and S. cerevisiae shift	0.406216	3.82022
GO:0000184_P	17	S. paradoxus and S. cerevisiae shift	0.384401	2.10243
GO:0016042_P	24	S. paradoxus and S. cerevisiae shift	0.378878	2.75738
GO:0032880_P	12	S. paradoxus and S. cerevisiae shift	0.368095	2.99376
GO:0051301_P	177	S. paradoxus and S. cerevisiae shift	0.363522	2.0214
GO:0006665_P	15	S. paradoxus and S. cerevisiae shift	0.360463	2.91822
GO:0000086_P	26	S. paradoxus and S. cerevisiae shift	0.355121	2.35685
GO:0007118_P	17	S. paradoxus and S. cerevisiae shift	0.35423	2.35358
GO:0044267_P	12	S. paradoxus and S. cerevisiae shift	0.340556	3.70125
GO:0006325_P	11	S. paradoxus and S. cerevisiae shift	0.325309	0.0001
GO:0000282_P	22	S. paradoxus and S. cerevisiae shift	0.313404	2.83888
GO:0000032_P	12	S. paradoxus and S. cerevisiae shift	0.255266	4.26592
GO:0030001_P	11	S. paradoxus and S. cerevisiae shift	0.249639	3.63292
GO:0007266_P	14	S. paradoxus and S. cerevisiae shift	0.248746	0.465424
GO:0006342_P	11	S. paradoxus and S. cerevisiae shift	0.233654	1.46559
GO:0003333_P	21	S. paradoxus and S. cerevisiae shift	0.205035	1.73042
GO:0006378_P	18	S. cerevisiae shift	0.845112	2.55813
GO:0006486_P	53	S. cerevisiae shift	0.694227	1.22792
GO:0006333_P	16	S. cerevisiae shift	0.544779	0.632576
GO:0031939_P	14	S. cerevisiae shift	0.540872	1.34133
GO:0016070_P	12	S. cerevisiae shift	0.514198	2.26174
GO:0030433_P	44	S. cerevisiae shift	0.457702	1.39995
GO:0006696_P	22	S. cerevisiae shift	0.436092	1.86882
GO:0016226_P	21	S. cerevisiae shift	0.403816	1.89616
GO:0006379_P	26	S. cerevisiae shift	0.379901	2.71541
GO:0006869_P	17	S. cerevisiae shift	0.351793	1.61155
GO:0016925_P	11	S. cerevisiae shift	0.309216	0.252747
GO:0043162_P	14	S. cerevisiae shift	0.283037	1.52624
GO:0006487_P	29	S. cerevisiae shift	0.282769	1.03572
GO:0006334_P	11	S. cerevisiae shift	0.276434	1.32323
GO:0006537_P	11	S. cerevisiae shift	0.23413	1.6196
GO:0006520_P	19	S. cerevisiae shift	0.231487	0.716935
GO:0044255_P	13	S. cerevisiae shift	0.187092	1.57804
GO:0042254_P	163	S. paradoxus shift	1	6.85614
GO:0006364_P	177	S. paradoxus shift	0.999996	5.84104
GO:0008150_P	723	S. paradoxus shift	0.999962	2.87196
GO:0001302_P	38	S. paradoxus shift	0.999927	6.67102
GO:0032259_P	65	S. paradoxus shift	0.998665	4.5469
GO:0007121_P	16	S. paradoxus shift	0.99858	16.8196
GO:0016310_P	188	S. paradoxus shift	0.996526	2.4871
GO:0000447_P	39	S. paradoxus shift	0.994506	5.25207
GO:0006468_P	120	S. paradoxus shift	0.990399	2.65521
GO:0019236_P	29	S. paradoxus shift	0.989882	6.82198
GO:0006407_P	18	S. paradoxus shift	0.988261	8.79245
GO:0006506_P	29	S. paradoxus shift	0.982054	5.46854
GO:0006412_P	228	S. paradoxus shift	0.981277	2.77078
GO:0006897_P	73	S. paradoxus shift	0.970677	4.40861
GO:0008033_P	69	S. paradoxus shift	0.969683	3.71475
GO:0006397_P	151	S. paradoxus shift	0.965172	3.02813
GO:0016567_P	71	S. paradoxus shift	0.959695	3.31392
GO:0042274_P	25	S. paradoxus shift	0.958076	8.08355
GO:0031505_P	72	S. paradoxus shift	0.955856	3.03227
GO:0000472_P	31	S. paradoxus shift	0.953734	4.68665
GO:0000480_P	29	S. paradoxus shift	0.928297	4.46058
GO:0006417_P	45	S. paradoxus shift	0.925463	5.33911
GO:0006812_P	28	S. paradoxus shift	0.898839	4.31252
GO:0071038_P	15	S. paradoxus shift	0.897253	6.75107
GO:0030488_P	18	S. paradoxus shift	0.893283	7.94509
GO:0006260_P	72	S. paradoxus shift	0.831407	3.04321
GO:0030163_P	15	S. paradoxus shift	0.823646	7.0092
GO:0000462_P	55	S. paradoxus shift	0.817627	7.29108
GO:0006006_P	22	S. paradoxus shift	0.816342	4.65554
GO:0006754_P	18	S. paradoxus shift	0.816303	4.66893
GO:0006200_P	34	S. paradoxus shift	0.811442	5.59094
GO:0007165_P	63	S. paradoxus shift	0.811091	4.46539
GO:0071042_P	13	S. paradoxus shift	0.804318	6.03095
GO:0007020_P	19	S. paradoxus shift	0.783305	4.60904
GO:0045454_P	27	S. paradoxus shift	0.772069	3.93971
GO:0006730_P	14	S. paradoxus shift	0.763184	5.24294
GO:0000082_P	27	S. paradoxus shift	0.759122	4.34991
GO:0016558_P	13	S. paradoxus shift	0.751666	6.15618
GO:0001403_P	37	S. paradoxus shift	0.748686	3.88819
GO:0006470_P	35	S. paradoxus shift	0.73356	3.06453
GO:0006139_P	21	S. paradoxus shift	0.732794	4.14782
GO:0000910_P	26	S. paradoxus shift	0.727436	4.06193
GO:0006811_P	88	S. paradoxus shift	0.718348	2.41911
GO:0008361_P	24	S. paradoxus shift	0.717677	3.71347
GO:0007015_P	32	S. paradoxus shift	0.713063	3.58934
GO:0006446_P	13	S. paradoxus shift	0.695361	10.2871
GO:0042790_P	15	S. paradoxus shift	0.668616	4.71396
GO:0001300_P	17	S. paradoxus shift	0.650005	5.25665
GO:0006396_P	25	S. paradoxus shift	0.649144	4.25531
GO:0002098_P	22	S. paradoxus shift	0.628566	4.16376
GO:0006807_P	11	S. paradoxus shift	0.626678	4.74851
GO:0006950_P	103	S. paradoxus shift	0.626147	1.93516
GO:0006457_P	93	S. paradoxus shift	0.622492	2.15582
GO:0051666_P	13	S. paradoxus shift	0.61998	7.55441
GO:0000054_P	11	S. paradoxus shift	0.613651	9.7353
GO:0006164_P	14	S. paradoxus shift	0.586359	4.02036
GO:0042797_P	15	S. paradoxus shift	0.583992	4.54194
GO:0071051_P	14	S. paradoxus shift	0.575508	4.69093
GO:0070481_P	19	S. paradoxus shift	0.570644	3.67105
GO:0000183_P	22	S. paradoxus shift	0.563531	4.11944
GO:0000147_P	13	S. paradoxus shift	0.562369	6.04232
GO:0015992_P	36	S. paradoxus shift	0.561241	2.68697
GO:0006906_P	18	S. paradoxus shift	0.547357	4.96021
GO:0008380_P	93	S. paradoxus shift	0.545933	3.14349
GO:0034727_P	33	S. paradoxus shift	0.545192	5.70228
GO:0015986_P	13	S. paradoxus shift	0.540079	4.11067
GO:0055114_P	225	S. paradoxus shift	0.526485	2.9068
GO:0000750_P	23	S. paradoxus shift	0.517221	4.18437
GO:0009651_P	11	S. paradoxus shift	0.513735	4.8023
GO:0007059_P	66	S. paradoxus shift	0.50999	2.10976
GO:0042273_P	37	S. paradoxus shift	0.500888	7.62094
GO:0006400_P	15	S. paradoxus shift	0.490735	4.42655
GO:0090305_P	36	S. paradoxus shift	0.479998	2.64515
GO:0030476_P	39	S. paradoxus shift	0.468548	3.25304
GO:0070816_P	14	S. paradoxus shift	0.449167	3.78787
GO:0006338_P	45	S. paradoxus shift	0.438776	2.56176
GO:0000070_P	24	S. paradoxus shift	0.432714	3.97134
GO:0055085_P	164	S. paradoxus shift	0.430048	2.05106
GO:0007049_P	291	S. paradoxus shift	0.4264	2.40916
GO:0070651_P	15	S. paradoxus shift	0.41361	3.72042
GO:0000754_P	12	S. paradoxus shift	0.410569	5.22553
GO:0006261_P	18	S. paradoxus shift	0.402846	3.3387
GO:0034475_P	11	S. paradoxus shift	0.400867	4.65073
GO:0070478_P	16	S. paradoxus shift	0.388476	3.67866
GO:0034427_P	12	S. paradoxus shift	0.385609	3.92353
GO:0043547_P	33	S. paradoxus shift	0.373794	3.07357
GO:0006272_P	12	S. paradoxus shift	0.365866	4.09519
GO:0000956_P	12	S. paradoxus shift	0.364189	5.05802
GO:0030473_P	12	S. paradoxus shift	0.355714	4.4537
GO:0007067_P	122	S. paradoxus shift	0.352656	1.84062
GO:0006094_P	15	S. paradoxus shift	0.348539	3.1862
GO:0071035_P	15	S. paradoxus shift	0.331047	3.77944
GO:0000725_P	12	S. paradoxus shift	0.325017	3.45931
GO:0007103_P	14	S. paradoxus shift	0.32279	2.93326
GO:0030437_P	45	S. paradoxus shift	0.322069	2.14179
GO:0006744_P	11	S. paradoxus shift	0.309692	3.42187
GO:0000077_P	18	S. paradoxus shift	0.307534	2.93802
GO:0008652_P	88	S. paradoxus shift	0.296197	1.765
GO:0032511_P	13	S. paradoxus shift	0.29049	2.88987
GO:0007064_P	22	S. paradoxus shift	0.285861	2.44571
GO:0031146_P	17	S. paradoxus shift	0.281536	2.92196
GO:0031145_P	11	S. paradoxus shift	0.273204	4.42668
GO:0009086_P	26	S. paradoxus shift	0.268964	2.23765
GO:0034087_P	15	S. paradoxus shift	0.266283	2.84754
GO:0030242_P	21	S. paradoxus shift	0.264172	2.64331
GO:0000045_P	12	S. paradoxus shift	0.260336	5.01193
GO:0006369_P	12	S. paradoxus shift	0.251019	2.64589
GO:0006891_P	21	S. paradoxus shift	0.246455	2.6497
GO:0015914_P	14	S. paradoxus shift	0.226287	3.05742
GO:0006273_P	11	S. paradoxus shift	0.222417	3.10698
GO:0006970_P	25	S. paradoxus shift	0.221528	2.27191
GO:0006348_P	52	S. paradoxus shift	0.221026	1.93096
GO:0006873_P	11	S. mikatae shift	0.783125	1.79065
GO:0000727_P	25	S. mikatae shift	0.677692	0.382999
GO:0006284_P	15	S. mikatae shift	0.624148	0.654562
GO:0045893_P	15	S. mikatae shift	0.565608	0.977123
GO:0006999_P	11	S. mikatae shift	0.555374	0.922147
GO:0030150_P	19	S. mikatae shift	0.514926	2.19995
GO:0030950_P	12	S. mikatae shift	0.492716	1.74858
GO:0000209_P	19	S. mikatae shift	0.491172	0.453
GO:0042147_P	19	S. mikatae shift	0.475358	0.87239
GO:0009116_P	12	S. mikatae shift	0.405488	5.71101
GO:0030968_P	12	S. mikatae shift	0.402002	0.0701247
GO:0001558_P	11	S. mikatae shift	0.399476	0.893871
GO:0006098_P	13	S. mikatae shift	0.395462	1.3092
GO:0006612_P	13	S. mikatae shift	0.393039	1.04836
GO:0000722_P	11	S. mikatae shift	0.356206	1.11054
GO:0006513_P	15	S. mikatae shift	0.345068	0.537497
GO:0016485_P	14	S. mikatae shift	0.298292	2.04206
GO:0035335_P	12	S. mikatae shift	0.291448	1.17153
GO:0031929_P	17	S. mikatae shift	0.282871	1.66298
GO:0008298_P	14	S. mikatae shift	0.260915	0.853239
GO:0015991_P	13	S. mikatae shift	0.255837	0.448277
GO:0006303_P	22	S. mikatae shift	0.2335	0.563622
GO:0015031_P	362	S. bayanus shift	0.87294	2.07255
GO:0000122_P	71	S. bayanus shift	0.695161	2.10802
GO:0006623_P	42	S. bayanus shift	0.694258	2.40649
GO:0006890_P	27	S. bayanus shift	0.688467	1.58954
GO:0045944_P	127	S. bayanus shift	0.647337	2.3775
GO:0006366_P	89	S. bayanus shift	0.630606	1.36812
GO:0007131_P	46	S. bayanus shift	0.590467	2.39517
GO:0006406_P	33	S. bayanus shift	0.560806	1.87283
GO:0008152_P	243	S. bayanus shift	0.531318	2.16214
GO:0051028_P	61	S. bayanus shift	0.53028	2.51351
GO:0005975_P	80	S. bayanus shift	0.525113	3.55246
GO:0007124_P	48	S. bayanus shift	0.524375	1.55031
GO:0000055_P	22	S. bayanus shift	0.482447	2.48026
GO:0006879_P	28	S. bayanus shift	0.475255	1.94659
GO:0006184_P	31	S. bayanus shift	0.473069	1.07363
GO:0006631_P	34	S. bayanus shift	0.462111	2.16346
GO:0006629_P	136	S. bayanus shift	0.454884	1.98366
GO:0006895_P	14	S. bayanus shift	0.450844	1.7925
GO:0006888_P	76	S. bayanus shift	0.448612	1.14916
GO:0016192_P	130	S. bayanus shift	0.448393	2.15057
GO:0042144_P	28	S. bayanus shift	0.436444	2.42114
GO:0031124_P	23	S. bayanus shift	0.432594	1.87918
GO:0000002_P	33	S. bayanus shift	0.424767	2.23919
GO:0000011_P	17	S. bayanus shift	0.380159	3.66046
GO:0006298_P	23	S. bayanus shift	0.375835	3.06892
GO:0007117_P	14	S. bayanus shift	0.360601	1.2933
GO:0032543_P	84	S. bayanus shift	0.347439	1.06851
GO:0009058_P	35	S. bayanus shift	0.317401	2.49063
GO:0000724_P	16	S. bayanus shift	0.310203	0.87934
GO:0045047_P	14	S. bayanus shift	0.276378	0.232718
GO:0030174_P	11	S. bayanus shift	0.276021	0.985522
GO:0000079_P	25	S. bayanus shift	0.268467	1.67669
GO:0005978_P	13	S. bayanus shift	0.239542	1.61758
GO:0000467_P	16	S. bayanus shift	0.238459	2.41712
GO:0006887_P	38	S. bayanus shift	0.234032	1.29178
GO:0006611_P	14	S. bayanus shift	0.229651	2.0086
GO:0006281_P	175	Ornstein-Uhlenbeck	0.882367	2.26342
GO:0000422_P	27	Ornstein-Uhlenbeck	0.877577	5.59902
GO:0006810_P	681	Ornstein-Uhlenbeck	0.859937	2.27112
GO:0006914_P	49	Ornstein-Uhlenbeck	0.810294	3.8158
GO:0002181_P	128	Ornstein-Uhlenbeck	0.766483	4.79011
GO:0006310_P	44	Ornstein-Uhlenbeck	0.750178	1.91358
GO:0006337_P	17	Ornstein-Uhlenbeck	0.694963	4.70201
GO:0043044_P	20	Ornstein-Uhlenbeck	0.692244	4.8219
GO:0051276_P	15	Ornstein-Uhlenbeck	0.688319	2.86005
GO:0055072_P	18	Ornstein-Uhlenbeck	0.676908	2.82196
GO:0030466_P	39	Ornstein-Uhlenbeck	0.676084	2.51679
GO:0042138_P	11	Ornstein-Uhlenbeck	0.671588	2.90366
GO:0016568_P	111	Ornstein-Uhlenbeck	0.6612	2.62675
GO:0006511_P	62	Ornstein-Uhlenbeck	0.656983	1.90276
GO:0006974_P	188	Ornstein-Uhlenbeck	0.650117	2.25461
GO:0006368_P	48	Ornstein-Uhlenbeck	0.620031	2.85299
GO:0006096_P	22	Ornstein-Uhlenbeck	0.613215	5.55329
GO:0006351_P	462	Ornstein-Uhlenbeck	0.609809	2.38375
GO:0006357_P	94	Ornstein-Uhlenbeck	0.584493	1.9386
GO:0006355_P	443	Ornstein-Uhlenbeck	0.568297	2.08003
GO:0000028_P	12	Ornstein-Uhlenbeck	0.565236	5.2596
GO:0006913_P	16	Ornstein-Uhlenbeck	0.557054	3.8307
GO:0007126_P	124	Ornstein-Uhlenbeck	0.556145	1.77605
GO:0006694_P	23	Ornstein-Uhlenbeck	0.552919	2.08961
GO:0032968_P	22	Ornstein-Uhlenbeck	0.541104	2.96934
GO:0008202_P	22	Ornstein-Uhlenbeck	0.540703	2.31847
GO:0009060_P	47	Ornstein-Uhlenbeck	0.53529	2.40624
GO:0000973_P	16	Ornstein-Uhlenbeck	0.527269	2.27444
GO:0044262_P	14	Ornstein-Uhlenbeck	0.509734	5.91054
GO:0016573_P	41	Ornstein-Uhlenbeck	0.49187	2.26072
GO:0006302_P	25	Ornstein-Uhlenbeck	0.480313	7.23532
GO:0006886_P	80	Ornstein-Uhlenbeck	0.479831	2.12972
GO:0016126_P	26	Ornstein-Uhlenbeck	0.464031	1.70141
GO:0046854_P	12	Ornstein-Uhlenbeck	0.460223	4.48479
GO:0006896_P	22	Ornstein-Uhlenbeck	0.453683	2.19203
GO:0007076_P	11	Ornstein-Uhlenbeck	0.431121	4.27265
GO:0000398_P	70	Ornstein-Uhlenbeck	0.424388	3.30937
GO:0008299_P	11	Ornstein-Uhlenbeck	0.421799	3.09297
GO:0007034_P	17	Ornstein-Uhlenbeck	0.415868	1.76523
GO:0006415_P	12	Ornstein-Uhlenbeck	0.41226	4.40092
GO:0006259_P	12	Ornstein-Uhlenbeck	0.399984	3.84051
GO:0000710_P	11	Ornstein-Uhlenbeck	0.398915	2.52299
GO:0007264_P	48	Ornstein-Uhlenbeck	0.394402	2.29745
GO:0006360_P	11	Ornstein-Uhlenbeck	0.388809	3.4913
GO:0006413_P	39	Ornstein-Uhlenbeck	0.386312	2.93436
GO:0044237_P	12	Ornstein-Uhlenbeck	0.383906	4.16195
GO:0006606_P	36	Ornstein-Uhlenbeck	0.377035	2.93719
GO:0006541_P	16	Ornstein-Uhlenbeck	0.364297	3.32109
GO:0007033_P	13	Ornstein-Uhlenbeck	0.363995	4.56901
GO:0032889_P	12	Ornstein-Uhlenbeck	0.347431	3.94614
GO:0006099_P	28	Ornstein-Uhlenbeck	0.341922	2.46217
GO:0032258_P	36	Ornstein-Uhlenbeck	0.331984	2.17068
GO:0007031_P	25	Ornstein-Uhlenbeck	0.32175	2.11142
GO:0006267_P	15	Ornstein-Uhlenbeck	0.321179	2.50026
GO:0030435_P	94	Ornstein-Uhlenbeck	0.316589	1.66801
GO:0006893_P	23	Ornstein-Uhlenbeck	0.305906	3.1745
GO:0006865_P	33	Ornstein-Uhlenbeck	0.292197	1.95063
GO:0000001_P	26	Ornstein-Uhlenbeck	0.273688	1.93436
GO:0006915_P	20	Ornstein-Uhlenbeck	0.266093	2.73752
GO:0006878_P	12	Ornstein-Uhlenbeck	0.26269	2.11829
GO:0043161_P	34	Ornstein-Uhlenbeck	0.259569	1.63651
GO:0006270_P	32	Ornstein-Uhlenbeck	0.259389	2.27643
GO:0051123_P	28	Ornstein-Uhlenbeck	0.25615	2.21178
GO:0006312_P	11	Ornstein-Uhlenbeck	0.253074	4.06393
GO:0006607_P	11	Ornstein-Uhlenbeck	0.238806	1.6005
GO:0009272_P	13	Ornstein-Uhlenbeck	0.2355	3.15006
GO:0042787_P	22	Ornstein-Uhlenbeck	0.233085	2.17863
GO:0042493_P	18	Ornstein-Uhlenbeck	0.231114	2.52476
GO:0006301_P	12	Ornstein-Uhlenbeck	0.215408	1.68728
